# Supplementary material for: WUSCHEL-RELATED HOMEOBOX4 acts as a key regulator in early leaf development in rice
Source: PubMed Central journal article supplement (PMC5933814; doi:10.1371/journal.pgen.1007365), 2018-04-23

| up | down | GO term                                                               | FDR       |
|----|------|-----------------------------------------------------------------------|-----------|
| █  | █    | response to stimulus                                                  | < 0.00005 |
| █  | █    | response to stress                                                    | < 0.00005 |
| █  | █    | response to biotic stimulus                                           | < 0.00005 |
| █  | █    | response to endogenous stimulus                                       | < 0.00005 |
| █  | █    | response to abiotic stimulus                                          | < 0.0005  |
| █  | █    | metabolic process                                                     | < 0.0005  |
| █  | █    | secondary metabolic process                                           | < 0.0005  |
| █  | █    | catabolic process                                                     | < 0.05    |
| █  | █    | nitrogen compound metabolic process                                   | < 0.05    |
| █  | █    | primary metabolic process                                             | < 0.05    |
| █  | █    | nucleobase, nucleoside, nucleotide and nucleic acid metabolic process | < 0.05    |
| █  | █    | DNA metabolic process                                                 | < 0.05    |
| █  | █    | biosynthetic process                                                  | < 0.05    |
| █  | █    | macromolecule biosynthetic process                                    | < 0.05    |
| █  | █    | cellular macromolecule metabolic process                              | < 0.05    |
| █  | █    | cellular macromolecule biosynthetic process                           | < 0.05    |
| █  | █    | gene expression                                                       | < 0.05    |
| █  | █    | translation                                                           | < 0.05    |
| █  | █    | cellular component organization                                       | < 0.05    |
| █  | █    | cellular process                                                      | < 0.05    |
| █  | █    | cell cycle                                                            | < 0.05    |
| █  | █    | cellular metabolic process                                            | < 0.05    |
| █  | █    | photosynthesis                                                        | < 0.05    |
| █  | █    | generation of precursor metabolites and energy                        | < 0.05    |
| █  | █    | cellular biosynthetic process                                         | < 0.05    |
| █  | █    | biological regulation                                                 | < 0.05    |
| █  | █    | regulation of cellular process                                        | < 0.05    |
| █  | █    | signaling                                                             | < 0.05    |
| █  | █    | signaling process                                                     | < 0.05    |
| █  | █    | signal transduction                                                   | < 0.05    |
| █  | █    | signal transmission                                                   | < 0.05    |

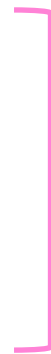

Supplement: pgen.1007365.s007.pdf [file pgen.1007365.s007.pdf]
