# Supplementary material for: WUSCHEL-RELATED HOMEOBOX4 acts as a key regulator in early leaf development in rice
Source: PubMed Central journal article supplement (PMC5933814; doi:10.1371/journal.pgen.1007365), 2018-04-23
Supplement: pgen.1007365.s001.pdf [file pgen.1007365.s001.pdf]

S1 Table. Expression levels of *WOX* gene members obtained by microarray analysis

|                     | Average $\pm$ SE |                |                |                |
|---------------------|------------------|----------------|----------------|----------------|
|                     | 3 h              |                | 12 h           |                |
|                     | -DEX             | +DEX           | -DEX           | +DEX           |
| <i>TAB1 (OsWUS)</i> | 41 $\pm$ 1.5     | 39 $\pm$ 0.6   | 46 $\pm$ 3.0   | 52 $\pm$ 2.7   |
| <i>WOX2</i>         | 39 $\pm$ 2.5     | 41 $\pm$ 1.9   | 42 $\pm$ 2.3   | 60 $\pm$ 1.5   |
| <i>OsWOX3</i>       | 167 $\pm$ 2.7    | 166 $\pm$ 1.4  | 179 $\pm$ 5.1  | 144 $\pm$ 3.8  |
| <i>QHB (OsWOX5)</i> | 17 $\pm$ 0.5     | 20 $\pm$ 2.1   | 18 $\pm$ 2.2   | 269 $\pm$ 36.5 |
| <i>OsWOX8/9</i>     | 23 $\pm$ 3.3     | 26 $\pm$ 1.8   | 28 $\pm$ 2.1   | 41 $\pm$ 7.0   |
|                     | 17 $\pm$ 0.6     | 18 $\pm$ 0.5   | 15 $\pm$ 0.8   | 19 $\pm$ 0.9   |
| <i>OsWOX11/12</i>   | 14 $\pm$ 1.3     | 16 $\pm$ 1.0   | 14 $\pm$ 0.9   | 16 $\pm$ 1.8   |
|                     | 44 $\pm$ 3.1     | 38 $\pm$ 0.7   | 36 $\pm$ 1.7   | 34 $\pm$ 0.6   |
|                     | 153 $\pm$ 21.4   | 109 $\pm$ 16.6 | 164 $\pm$ 19.3 | 117 $\pm$ 12.4 |
| <i>OsWOX13</i>      | 175 $\pm$ 7.2    | 206 $\pm$ 13.1 | 190 $\pm$ 12.7 | 158 $\pm$ 7.2  |
