# Supplementary material for: WUSCHEL-RELATED HOMEOBOX4 acts as a key regulator in early leaf development in rice
Source: PubMed Central journal article supplement (PMC5933814; doi:10.1371/journal.pgen.1007365), 2018-04-23

A

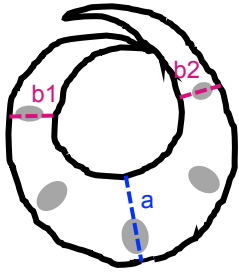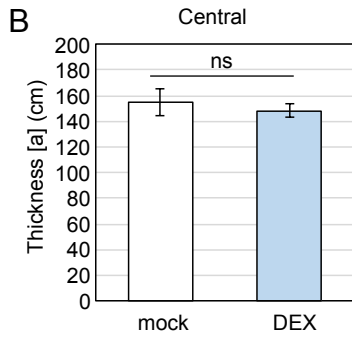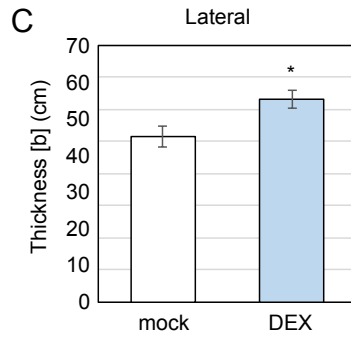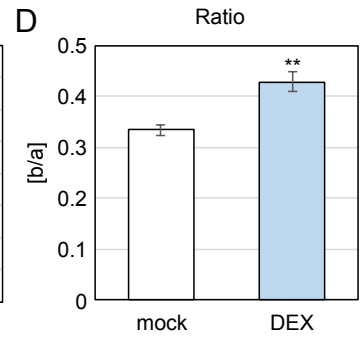

Supplement: pgen.1007365.s005.pdf [file pgen.1007365.s005.pdf]
