# Supplementary material for: WUSCHEL-RELATED HOMEOBOX4 acts as a key regulator in early leaf development in rice
Source: PubMed Central journal article supplement (PMC5933814; doi:10.1371/journal.pgen.1007365), 2018-04-23
Supplement: pgen.1007365.s011.pdf [file pgen.1007365.s011.pdf]

Data for Fig 2C

The length of the 3rd, 4th and 5th leaves of DEX- and mock-treated plants

|            | 3rd leaf |      | 4th leaf |      | 5th leaf |      |
|------------|----------|------|----------|------|----------|------|
|            | -DEX     | +DEX | -DEX     | +DEX | -DEX     | +DEX |
| average    | 13.09    | 6.62 | 11.74    | 7.44 | 6.22     | 1.50 |
| SE         | 0.25     | 0.30 | 0.92     | 0.47 | 0.52     | 0.44 |
| <i>n</i> = | 16       | 17   | 16       | 17   | 9        | 10   |
|            | 13.6     | 5.2  | 12.4     | 6.5  | 6.3      | 2.2  |
|            | 12.3     | 5.1  | 15.4     | 5.4  | 5.3      | 0.2  |
|            | 13.4     | 5.1  | 6.4      | 5.8  | 7.1      | 4.1  |
|            | 14.2     | 5.8  | 6.5      | 7.3  | 3.6      | 0.3  |
|            | 13.0     | 4.4  | 12.8     | 3.8  | 6.1      | 0.4  |
|            | 12.9     | 5.5  | 5.6      | 4.7  | 7.2      | 2.1  |
|            | 12.6     | 7.7  | 8.4      | 7.6  | 5.6      | 1.6  |
|            | 14.0     | 8.4  | 15.0     | 8.5  | 9.2      | 3.3  |
|            | 13.3     | 6.7  | 14.4     | 8.0  | 5.6      | 0.5  |
|            | 14.6     | 7.1  | 16.0     | 10.5 |          | 0.3  |
|            | 12.7     | 8.0  | 14.5     | 10.6 |          |      |
|            | 12.2     | 7.0  | 15.4     | 6.8  |          |      |
|            | 14.2     | 6.8  | 13.7     | 8.8  |          |      |
|            | 13.3     | 7.7  | 13.2     | 8.3  |          |      |
|            | 12.6     | 7.8  | 7.2      | 8.6  |          |      |
|            | 10.5     | 7.9  | 10.9     | 9.4  |          |      |
|            |          | 6.3  |          | 5.9  |          |      |

Data for Fig 3E

The number of differentiated xylem cells in the central LVB of P4

|            | -DEX | +DEX |
|------------|------|------|
| average    | 2.8  | 2.2  |
| SE         | 0.17 | 0.12 |
| <i>n</i> = | 12   | 13   |
|            | 3    | 2    |
|            | 4    | 2    |
|            | 3    | 2    |
|            | 2    | 3    |
|            | 3    | 2    |
|            | 3    | 2    |
|            | 3    | 2    |
|            | 3    | 2    |
|            | 3    | 3    |
|            | 2    | 2    |
|            | 3    | 2    |
|            | 2    | 2    |
|            |      | 3    |

Data for Fig 3F

The area of xylem cells in the central LVB of P4

|            | -DEX  | +DEX  |
|------------|-------|-------|
| average    | 345.0 | 122.2 |
| SE         | 56.6  | 30.7  |
| <i>n</i> = | 12    | 13    |
|            | 434.3 | 13.0  |
|            | 491.8 | 75.7  |
|            | 615.8 | 57.0  |
|            | 329.4 | 90.1  |
|            | 491.9 | 26.4  |
|            | 385.3 | 18.2  |
|            | 628.6 | 114.9 |
|            | 174.6 | 37.2  |
|            | 115.0 | 149.5 |
|            | 162.1 | 129.1 |
|            | 276.2 | 367.5 |
|            | 34.8  | 298.9 |
|            |       | 211.5 |

Data for Fig 3G

The number of normal and incomplete LVBs in P4

|            | -DEX | +DEX |
|------------|------|------|
| average    | 5.8  | 5.2  |
| SE         | 0.25 | 0.23 |
| <i>n</i> = | 12   | 13   |
|            | 5    | 5    |
|            | 6    | 5    |
|            | 7    | 5    |
|            | 6    | 5    |
|            | 5    | 4    |
|            | 5    | 5    |
|            | 5    | 5    |
|            | 5    | 5    |
|            | 5    | 5    |
|            | 5    | 5    |
|            | 6    | 5    |
|            | 7    | 7    |
|            | 7    | 7    |
|            |      | 5    |

Data for Fig 5

Cytokinin content in DEX- and mock-treated plants

|            | iP    |       | tZ    |       | cZ    |       | DZ    |       |
|------------|-------|-------|-------|-------|-------|-------|-------|-------|
|            | -DEX  | +DEX  | -DEX  | +DEX  | -DEX  | +DEX  | -DEX  | +DEX  |
| average    | 0.142 | 0.089 | 2.554 | 0.546 | 0.459 | 0.543 | 0.061 | 0.067 |
| SE         | 0.015 | 0.004 | 0.257 | 0.060 | 0.042 | 0.012 | 0.005 | 0.004 |
| <i>n</i> = | 4     | 4     | 4     | 4     | 4     | 4     | 4     | 4     |
|            | 0.186 | 0.094 | 2.462 | 0.520 | 0.434 | 0.520 | 0.072 | 0.074 |
|            | 0.118 | 0.097 | 1.867 | 0.721 | 0.373 | 0.524 | 0.062 | 0.066 |
|            | 0.133 | 0.088 | 3.014 | 0.494 | 0.452 | 0.565 | 0.050 | 0.071 |
|            | 0.130 | 0.078 | 2.873 | 0.449 | 0.575 | 0.561 | 0.057 | 0.056 |

Data for Fig 6G

The number of cells in the central file of the P4 leaf primordium

|            | -DEX | +DEX |
|------------|------|------|
| average    | 11.3 | 8.2  |
| SE         | 0.43 | 0.46 |
| <i>n</i> = | 12   | 13   |
|            | 11   | 8    |
|            | 13   | 8    |
|            | 12   | 8    |
|            | 10   | 8    |
|            | 12   | 7    |
|            | 12   | 12   |
|            | 13   | 7    |
|            | 12   | 8    |
|            | 10   | 7    |
|            | 12   | 6    |
|            | 8    | 11   |
|            | 10   | 9    |
|            |      | 8    |

Data for Fig 9D

The length of the 3rd and 4th leaves of DEX- and mock-treated plants

|            | 3rd leaf |      | 4th leaf |      |
|------------|----------|------|----------|------|
|            | -DEX     | +DEX | -DEX     | +DEX |
| average    | 10.62    | 5.28 | 4.40     | 0.88 |
| SE         | 0.54     | 0.30 | 0.51     | 0.08 |
| <i>n</i> = | 6        | 6    | 6        | 6    |
|            | 11.0     | 4.7  | 4.5      | 0.6  |
|            | 12.8     | 6.0  | 6.2      | 1.0  |
|            | 9.9      | 5.5  | 4.7      | 0.9  |
|            | 9.2      | 5.0  | 4.2      | 0.8  |
|            | 11.2     | 6.2  | 4.5      | 1.2  |
|            | 9.6      | 4.3  | 2.3      | 0.8  |
